# Supplementary material for: Hetero-assembly of a Li4Ti5O12 nanosheet and multi-walled carbon nanotube nanocomposite for high-performance lithium and sodium ion batteries
Source: Royal Society of Chemistry journal article supplement (doi:10.1039/c6ra25651a), 2017-01-01
Supplement: c6ra25651a1.pdf [file c6ra25651a1.pdf]

## Electronic Supplementary Information

Hetero-assembly of  $\text{Li}_4\text{Ti}_5\text{O}_{12}$  nanosheets and multi-walled carbon nanotubes  
nanocomposite for high-performance lithium and sodium ion batteries

Y. Tian, Z. L. Wu, G. B. Xu, L. W. Yang\*, J. X. Zhong

*Hunan Key Laboratory of Micro-Nano Energy Materials and Devices, School of  
Physics and Optoelectronics, Xiangtan University, Hunan 411105, China*

---

\*Corresponding authors: [ylwxtu@xtu.edu.cn](mailto:ylwxtu@xtu.edu.cn);

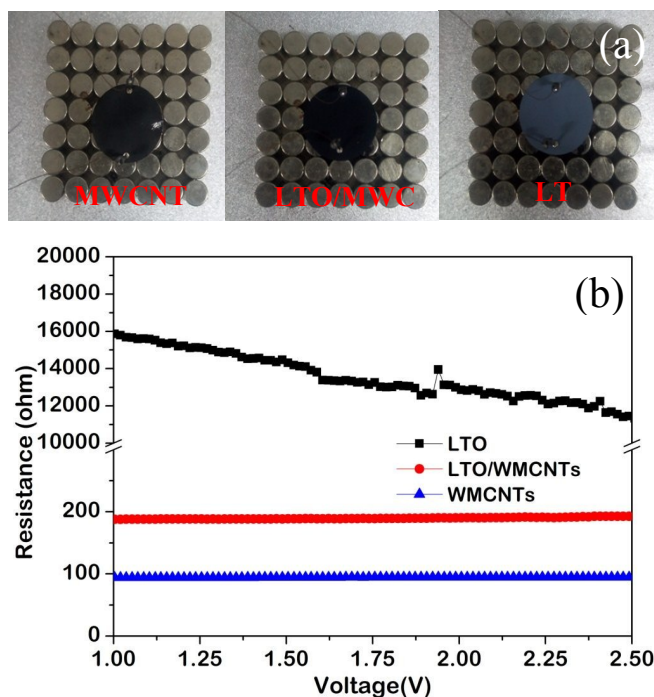

Figure S1. (a)-(b) The electrical conductivity experiments of the LTO/MWCNTs nanocomposite, LTO and MWCNTs were performed at the same distance over a voltage range of 1-2.5 V using a I-V test of Keithley 2612B system. The measuring electrodes were fabricated as follows: each sample was dissolved with PVDF (1:9 in weight ratio) in N-methyl-2-pyrrolidinone (NMP) to form slurry under stirring. The slurry was coated onto a circular Cu foil and dried at 120 °C in vacuum for 12 h. The MWCNTs exhibits highest electrical conductivity. Meanwhile, the presence of MWCNTs in the LTO/MWCNTs nanocomposite shows superior electrical conductivity than that of pure LTO.

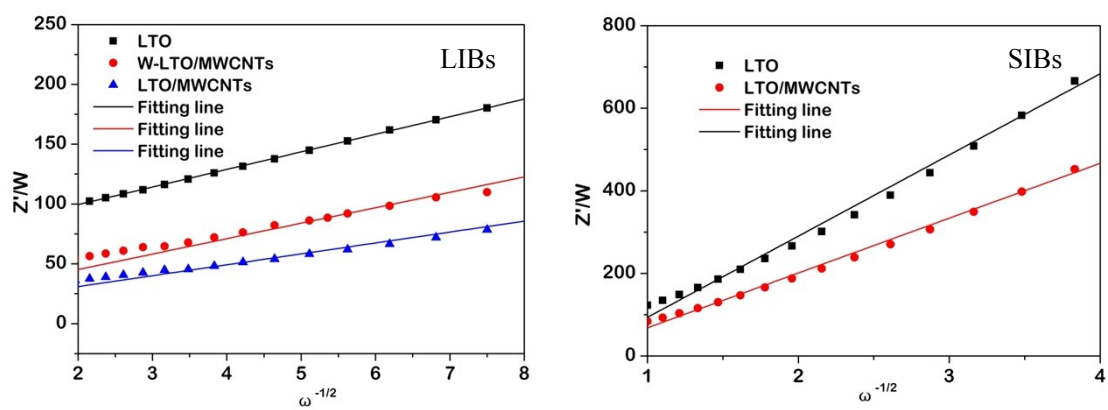

Figure S2. Plots between  $Z'$  and  $\omega^{-1/2}$  for LTO/MWCNTs and reference samples, respectively.

Table SI Rate performance and cycling performance of the structured  $\text{Li}_4\text{Ti}_5\text{O}_{12}$  (LTO) composite material prepared through different methods for LIBs.

| Compound                                                                                                            | 10C capacity [mAhg <sup>-1</sup> ] (LIBs) | 100C capacity [mAhg <sup>-1</sup> ] (LIBs) | Capacity retention at 10C (LIBs) | Reference        |
|---------------------------------------------------------------------------------------------------------------------|-------------------------------------------|--------------------------------------------|----------------------------------|------------------|
| <b>LTO/MWCNTs</b>                                                                                                   | <b>162</b>                                | <b>151(30C)</b>                            | <b>89.8% over 500 cycles</b>     | <b>This work</b> |
| LTO/graphene nanosheets                                                                                             | 135                                       | 82.7(60C)                                  | 97.5% over 100 cycles            | 1                |
| Cubic LTO/carbon composite                                                                                          | 151                                       | 134.9(20C)                                 | 80.3% over 200 cycles            | 2                |
| N-doped carbon coating LTO                                                                                          | 152                                       | 123                                        | 98.5% over 100 cycles            | 3                |
| LTO/reduced graphite oxides                                                                                         | 145                                       | 100                                        | 96% over 100cycle                | 4                |
| LTO-C Nanotube Arrays                                                                                               | 154                                       | 81                                         | 93% over 500 cycles              | 5                |
| Carbon-Templating LTO nanocrystal                                                                                   | 161                                       | >150                                       | 97.6% over 100 cycles            | 6                |
| NC-LTO-700 nanosheets                                                                                               | 145.8                                     | /                                          | 94.7% over 400 cycles (5C)       | 7                |
| CN-LTO-NMS                                                                                                          | 129                                       | /                                          | 95% during the 1000 cycles at 1C | 8                |
| Porous LTO with 7.0% NC                                                                                             | 129                                       | /                                          | 83% after 2200 cycles at 2 C     | 9                |
| NC-LTO                                                                                                              | 133.4                                     | /                                          | 95.9% after 1000 cycles at 1C    | 10               |
| Reduce graphene oxide modified $\text{Li}_4\text{Ti}_5\text{O}_{12}$ nanoparticles                                  | 158                                       | 143                                        | 54.6% after 2000 cycles at 80C   | 11               |
| Confined growth of $\text{Li}_4\text{Ti}_5\text{O}_{12}$ nanoparticles in nitrogen-doped mesoporous graphene fibers | 100                                       | 72 (30C)                                   | 89.6% after 1000                 | 12               |
| $\text{Li}_4\text{Ti}_5\text{O}_{12}$ /Hollow Graphitized Nano-Carbon Composites                                    | 120                                       | 85.8 (30C)                                 | 91.2% after 500 cycles at 5C     | 13               |

Table SII Rate performance and cycling performance of the structured  $\text{Li}_4\text{Ti}_5\text{O}_{12}$  (LTO) composite material prepared through different methods for SIBs.

| Compound                                                         | 0.5C capacity<br>[mAhg <sup>-1</sup> ]<br>(SIBs) | 5C capacity<br>[mAhg <sup>-1</sup> ]<br>(SIBs) | Capacity retention<br>at 1C (SIBs)                  | Reference        |
|------------------------------------------------------------------|--------------------------------------------------|------------------------------------------------|-----------------------------------------------------|------------------|
| <b>LTO/MWCNTs</b>                                                | <b>147</b>                                       | <b>83</b>                                      | <b>75.6% over 200<br/>cycles</b>                    | <b>This work</b> |
| Carbon-coated<br>$\text{Li}_4\text{Ti}_5\text{O}_{12}$ nanowires | 158                                              | 130                                            | 97% after 50 cycles<br>at 0.2C                      | 14               |
| $\text{Li}_4\text{Ti}_5\text{O}_{12}$ -RT                        | 180                                              | 132                                            | 97% after 200 cycles<br>and 67% after 400<br>cycles | 15               |
| $\text{Li}_4\text{Ti}_5\text{O}_{12}$ @C                         | 133                                              | 72 (2C)                                        | 92% after 100 cycles<br>at 0.2C                     | 16               |
| Porous $\text{Li}_4\text{Ti}_5\text{O}_{12}$                     | 121                                              | 55                                             | /                                                   | 17               |
| $\text{Li}_4\text{Ti}_5\text{O}_{12}$<br>Nanosheets              | 139                                              | 100 (2C)                                       | 93% after 150 cycles<br>at 0.5C                     | 18               |

## References

1. L. Shen, C. Yuan, H. Luo, X. Zhang, S. Yang and X. Lu, *Nanoscale*, 2011, **3**, 572-574.
2. B. Li, C. Han, Y.-B. He, C. Yang, H. Du, Q.-H. Yang and F. Kang, *Energy & Environmental Science*, 2012, **5**, 9595-9602.
3. N. Li, G. Zhou, F. Li, L. Wen and H. M. Cheng, *Advanced Functional Materials*, 2013, **23**, 5429-5435.
4. H.-K. Kim, S.-M. Bak and K.-B. Kim, *Electrochemistry Communications*, 2010, **12**, 1768-1771.
5. J. Liu, K. Song, P. A. van Aken, J. Maier and Y. Yu, *Nano letters*, 2014.
6. X. Hao and B. M. Bartlett, *Advanced Energy Materials*, 2013, **3**, 753-761.
7. C. Han, Y. He, B. Li, H. Li, J. Ma, H. Du, X. Qin, Q. Yang and F. Kang, *ChemSusChem*, 2014, **7**, 2567-2574.
8. G.-N. Zhu, H.-J. Liu, J.-H. Zhuang, C.-X. Wang, Y.-G. Wang and Y.-Y. Xia, *Energy & Environmental Science*, **4**, 4016-4022.
9. H. Li, L. Shen, X. Zhang, J. Wang, P. Nie, Q. Che and B. Ding, *Journal of power sources*, 2013, **221**, 122-127.
10. H. Li, L. Shen, K. Yin, J. Ji, J. Wang, X. Wang and X. Zhang, *Journal of Materials Chemistry A*, 2013, **1**, 7270-7276.
11. C. Chen, Y. Huang, H. Zhang, X. Wang, G. Li, Y. Wang, L. Jiao and H. Yuan, *Journal of Power Sources*, 2015, **278**, 693-702.
12. X. Jia, Y. Lu and F. Wei, *Nano Research*, 2016, **9**, 230-239.
13. L. Fan, X. Tan, T. Yu and Z. Shi, *RSC Adv.*, 2016, **6**, 26406-26411.
14. K.-T. Kim, C.-Y. Yu, C. S. Yoon, S.-J. Kim, Y.-K. Sun and S.-T. Myung, *Nano Energy*, 2015, **12**, 725-734.
15. Lin Yu Yang, Hui Zhong Li, Jun Liu, Sha Sha Tang, Ya Kun Lu, Si Te Li, Jie Min, Ning Yan and Ming Lei, *Journal of Materials Chemistry A*, 2013, **00**, 1-8.
16. J. Liu, K. Tang, K. Song, P. A. van Aken, Y. Yu and J. Maier, *Physical Chemistry Chemical Physics*, 2013, **15**, 20813.
17. G. Hasegawa, K. Kanamori, T. Kiyomura, H. Kurata, K. Nakanishi and T. Abe, *Advanced Energy Materials*, 2015, **5**, n/a-n/a.

18. X. Feng, H. Zou, H. Xiang, X. Guo, T. Zhou, Y. Wu, W. Xu, P. Yan, C. Wang, J.-G. Zhang and Y. Yu, *ACS Applied Materials & Interfaces*, 2016, **8**, 16718-16726.
